# Supplementary material for: Recurrent neural network-based volumetric fluorescence microscopy
Source: PubMed Central journal article supplement (PMC7985192; doi:10.1038/s41377-021-00506-9), 2021-03-23
Supplement: 41377_2021_506_MOESM4_ESM.pdf [file 41377_2021_506_MOESM4_ESM.pdf]

Supplementary Information for:

# **Recurrent neural network-based volumetric fluorescence microscopy**

## **Authors:**

Luzhe Huang<sup>1,2,3</sup>, Hanlong Chen<sup>1</sup>, Yilin Luo<sup>1</sup>, Yair Rivenson<sup>1,2,3</sup>, Aydogan Ozcan<sup>1,2,3,4\*</sup>

## **Affiliations:**

<sup>1</sup> Electrical and Computer Engineering Department, University of California, Los Angeles, California 90095, USA

<sup>2</sup> Bioengineering Department, University of California, Los Angeles, California 90095, USA

<sup>3</sup> California Nano Systems Institute (CNSI), University of California, Los Angeles, California 90095, USA

<sup>4</sup> David Geffen School of Medicine, University of California, Los Angeles, California 90095, USA

## **Email addresses of all the authors:**

lzhaung0324@ucla.edu, hanlongchen96@gmail.com, yilinluo@ucla.edu, rivensonyair@ucla.edu, ozcan@ucla.edu

## **Correspondence:**

Dr. Aydogan Ozcan

Address: 420 Westwood Plaza, Engr. IV 68-119, UCLA, Los Angeles, CA 90095, USA

Tel: +1(310)825-0915

Fax: +1(310)206-4685

ozcan@ucla.edu

## Supplementary Note 1: Comparison between Recurrent-MZ and interpolation algorithms

In general, the forward imaging model of wide-field microscopy can be expressed as<sup>1</sup>:

$$g_z = \mathcal{P}\{H_z H f\} + \mathcal{T}$$

where  $\mathcal{P}, \mathcal{T}$  stand for a Poisson random process and noise terms caused by e.g., thermal noise and various sources of imperfections in the imaging system, respectively;  $\mathcal{T}$  is often modelled as an additive Gaussian white noise.  $H$  is a circulant matrix representing 3D convolution with the system's PSF,  $H_z$  is a down-sampling matrix resulting in the sparse input image scans at axial planes  $z_i, i = 1, 2, \dots, M$ , and  $g_z, f$  are the vectorized output image and the object, respectively. Recurrent-MZ solves the volumetric image propagation problem to reconstruct images  $g_z, \tilde{z} \in Z$  within a sample volume using an input sequence  $g_{z_i}, i = 1, 2, \dots, M$ . In contrast, standard interpolation algorithms simply model  $g_z$  as a specific continuous function, e.g., Hermite polynomial, linear function, etc. within each interval between given data nodes. Existing interpolation algorithms<sup>2-4</sup> are therefore incapable of *physically-correct* volumetric propagation of fluorescence images. As shown in Fig. S1, Recurrent-MZ matches the corresponding ground truth images very well, while various forms of interpolation methods fail and start to hallucinate features that are not real. Figure S1(b) further illustrates that Recurrent-MZ (red line) outperforms these interpolation algorithms in terms of both RMSE and PSNR metrics.

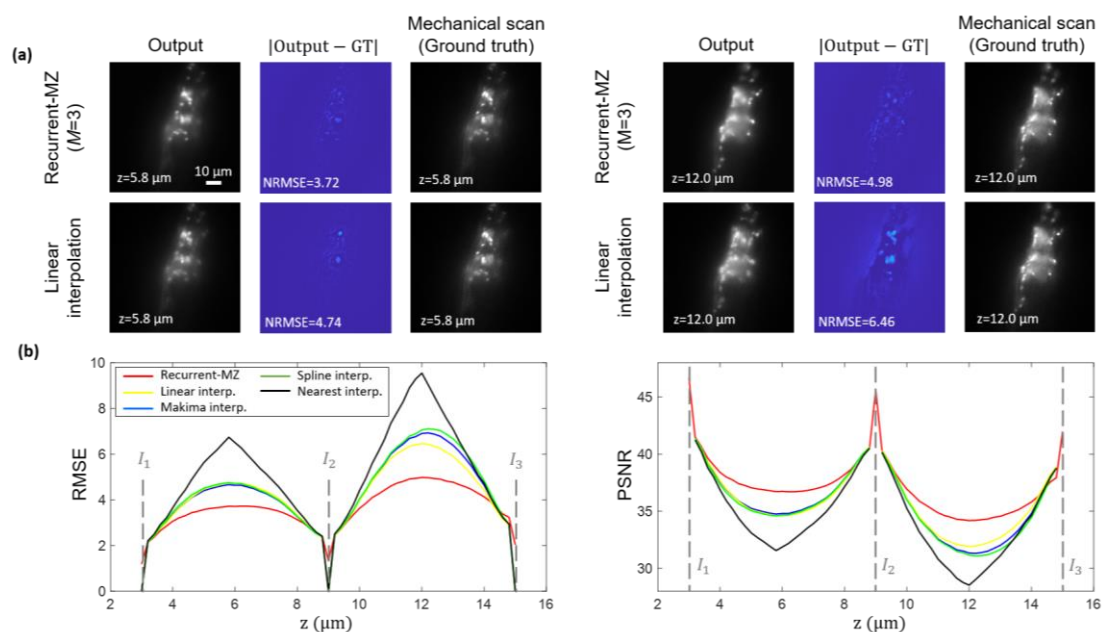

**Fig. S1** Comparison of Recurrent-MZ and various interpolation methods. Four different 3D interpolation algorithms, including linear, modified Akima (makima)<sup>3,4</sup>, spline (cubic) and nearest interpolation, were applied to the same input images used by Recurrent-MZ. Recurrent-MZ outperforms these interpolation algorithms in terms of both RMSE and PSNR metrics.

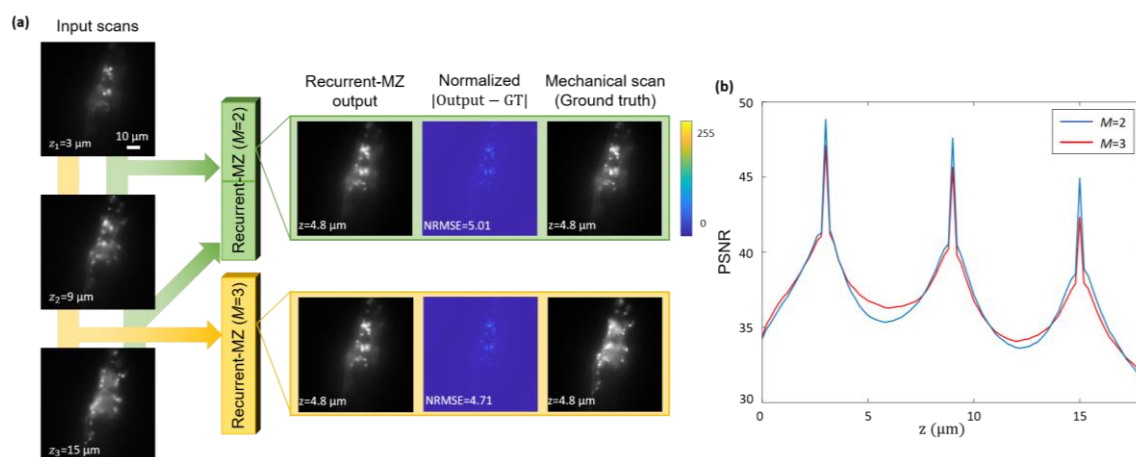

**Fig. S2** Comparison of the use of different  $M$  in Recurrent-MZ. (a) The two networks were trained on the same dataset. For the testing sequence with 3

input images, the network with  $M = 2$  takes in the 2 nearest input images to each output plane, while the network with  $M = 3$  always takes in all 3 input images. (b) The PSNR values of the output images are calculated with respect to the corresponding ground truth image. Blue: Outputs of the Recurrent-MZ ( $M=2$ ); Red: Outputs of the Recurrent-MZ ( $M=3$ ).

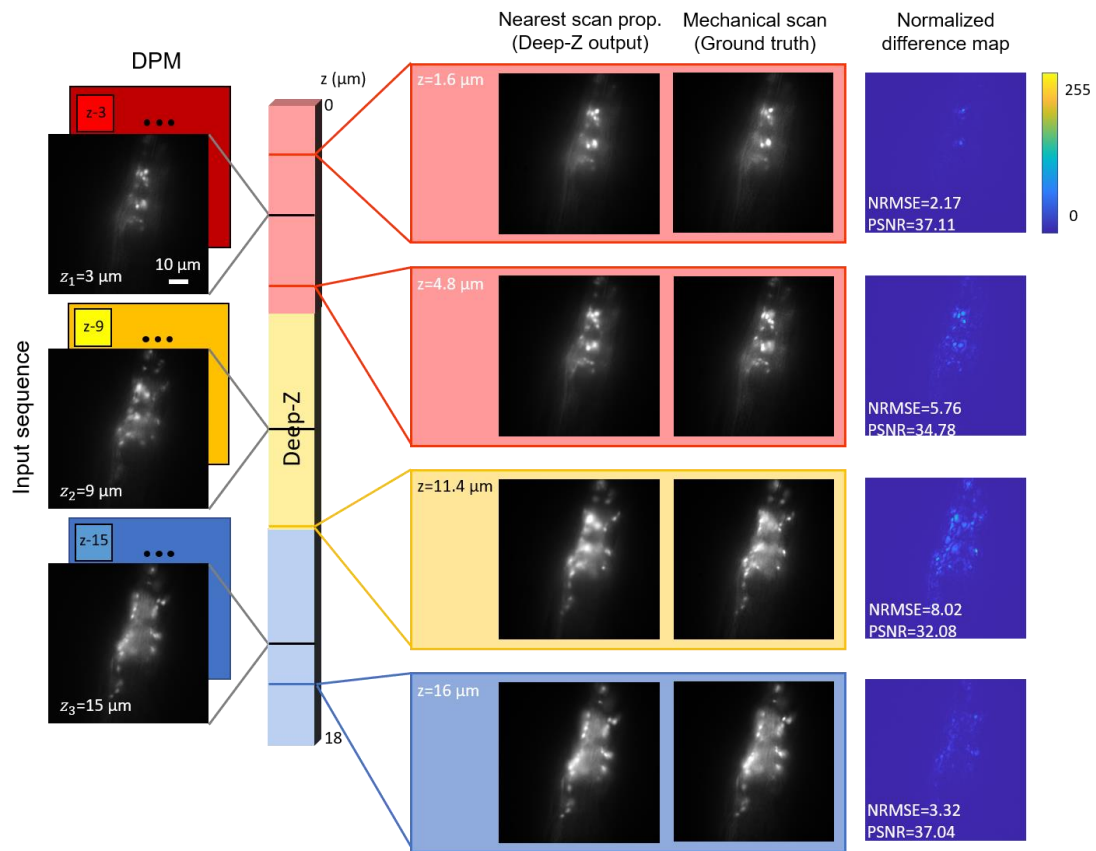

**Fig. S3** Volumetric image reconstruction using Deep-Z on a *C. elegans* sample. Deep-Z takes in a single input image to infer an output image at the designated plane, as indicated by the color of each output box. See Fig. 2 for a comparison against Recurrent-MZ.

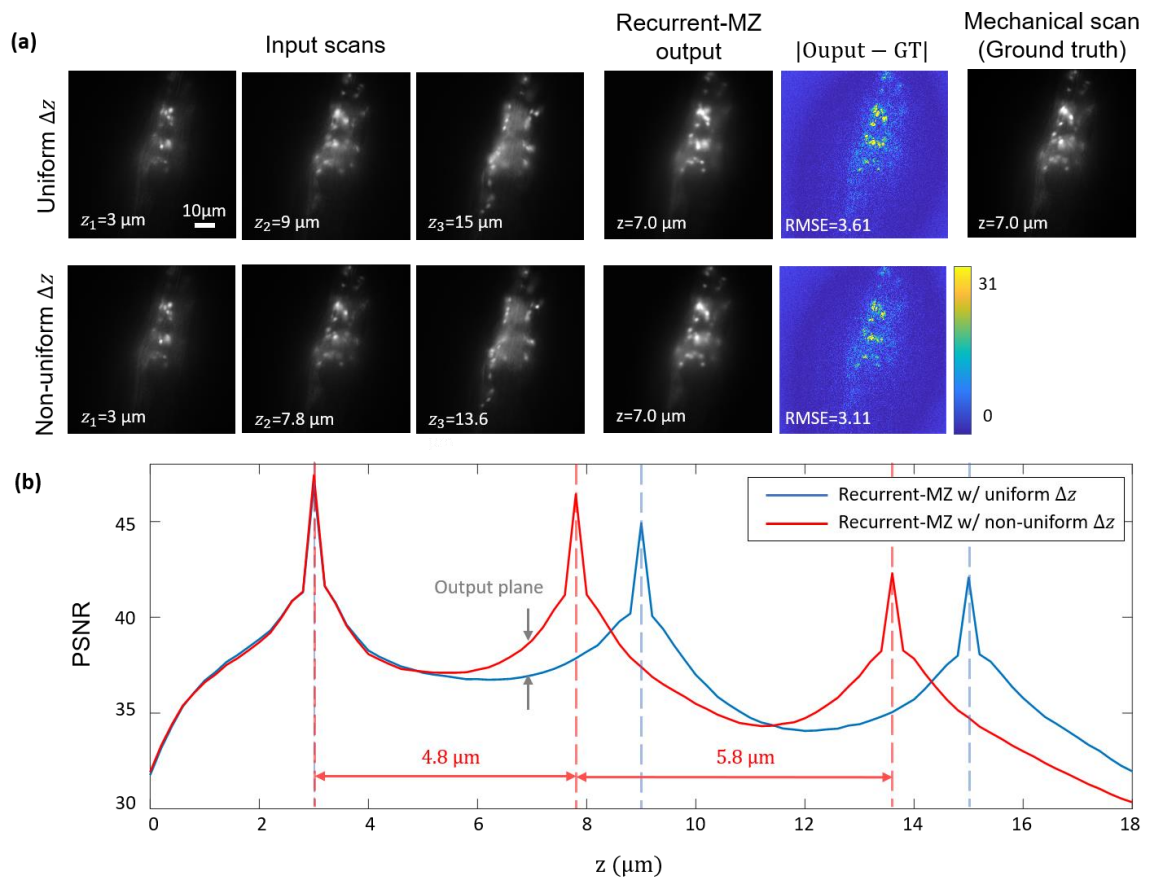

**Fig. S4** Generalization of Recurrent-MZ to non-uniformly spaced input images. (a) Recurrent-MZ was trained on *C. elegans* samples with equidistant inputs ( $M=3$ ,  $\Delta z = 6 \mu\text{m}$ ), and blindly tested on both uniformly sampled and non-uniformly sampled input images of new samples. (b) The PSNR values of the output images of Recurrent-MZ with uniformly spaced, and non-uniformly spaced input images are calculated with respect to the ground truth, corresponding image. Blue: Outputs of Recurrent-MZ ( $M=3$ ) for uniformly spaced inputs, Red: Outputs of Recurrent-MZ ( $M=3$ ) for non-uniformly spaced inputs. Dashed lines indicate the axial positions of the input 2D images.

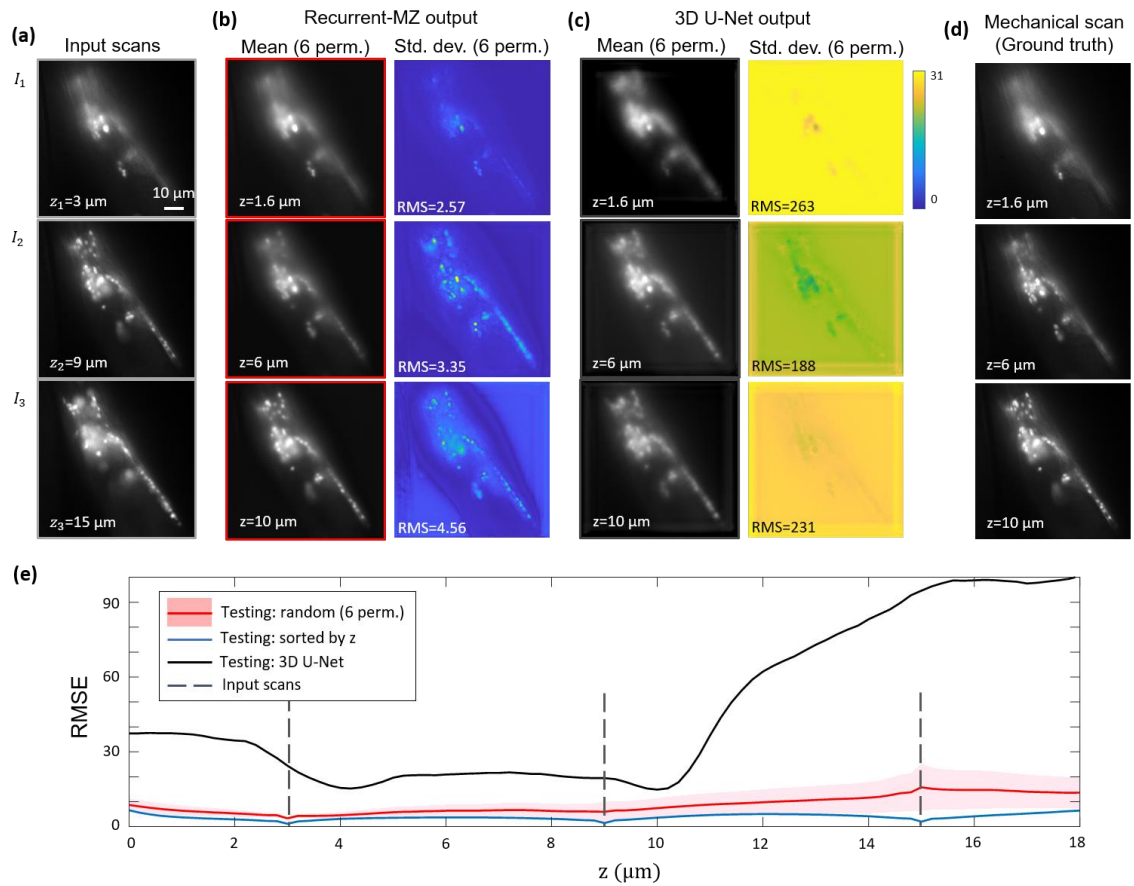

**Fig. S5** Input image permutation invariance of Recurrent-MZ compared against the failure of 3D U-Net due to input image permutations. Recurrent-MZ ( $M=3$ ) and 3D U-Net were trained with inputs sorted by  $z$  and blindly tested on new samples with 6 random permutations of the input images. (a) The input scans sorted by  $z$ , (b) the mean output and standard variance generated by Recurrent-MZ over 6 input image permutations, (c) the mean output and pixel-wise standard variance generated by 3D U-Net over 6 input image permutations, (d) the ground truth images obtained by mechanical scanning, (e) RMSE vs.  $z$  plot. Red solid line: average RMSE of the output images generated by Recurrent-MZ over 6 random permutation of the inputs;

Pink shadow: standard variance of the RMSE of the output images generated by Recurrent-MZ over 6 random permutation of the inputs; Blue solid line: RMSE of the output images generated by Recurrent-MZ with inputs sorted by  $z$ ; Black solid line: average RMSE of the output images generated by 3D U-Net over 6 random permutation of the inputs.

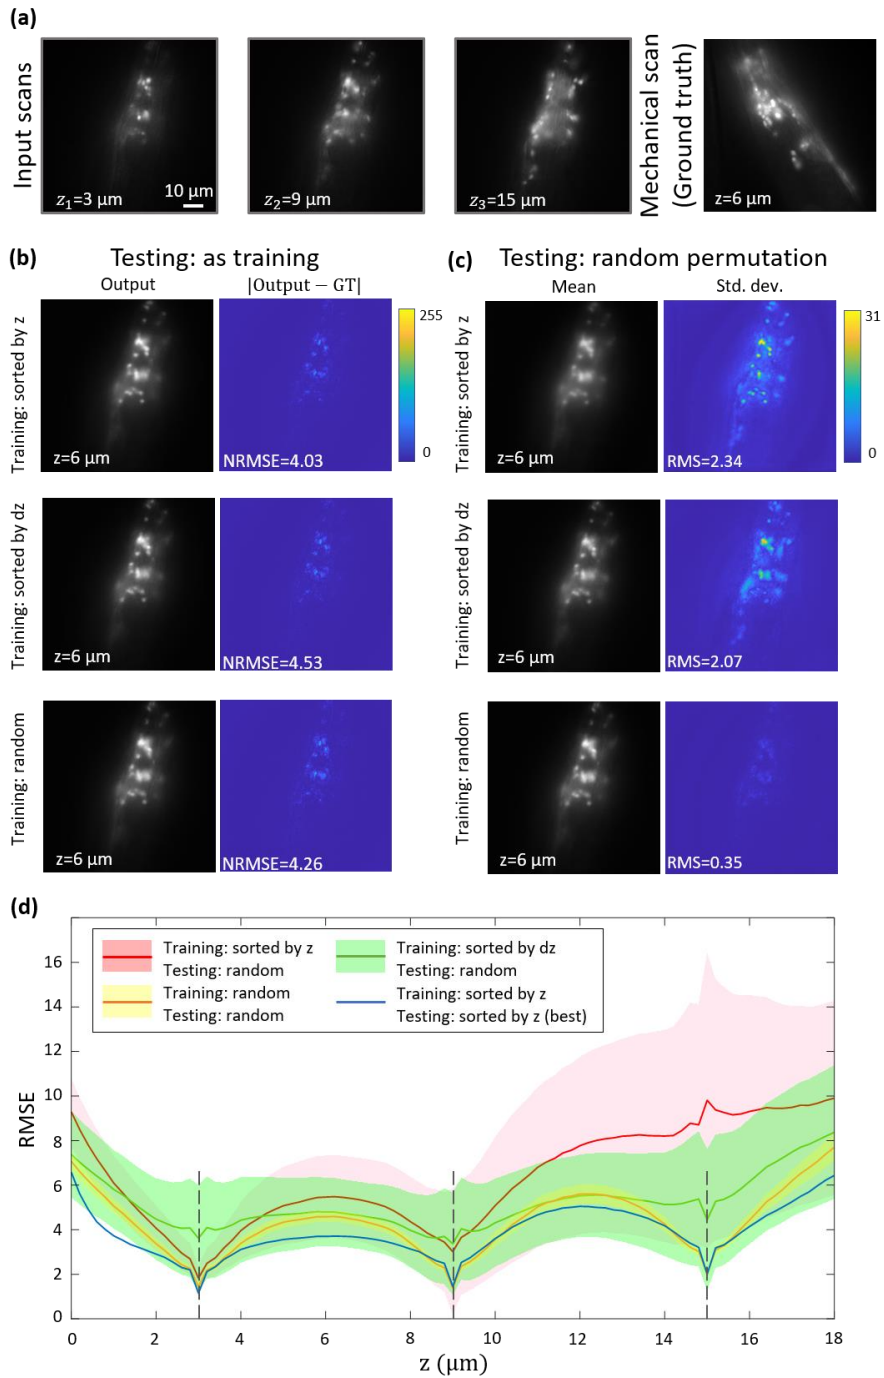

**Fig. S6** Recurrent-MZ inference performance with different training schemes. (a) The input sequence and ground truth image of the test FOV.



Recurrent-MZ ( $M=3$ ) was trained, separately, with input sequences sorted by  $z$ , sorted by  $dz$ , as well as randomly sorted images. The corresponding Recurrent-MZ networks were then tested with (b) the same image sorting used in training, and (c) 6 random permutations of the original input sequence. (d) The RMSE values of the output images of Recurrent-MZ trained using these three different schemes.

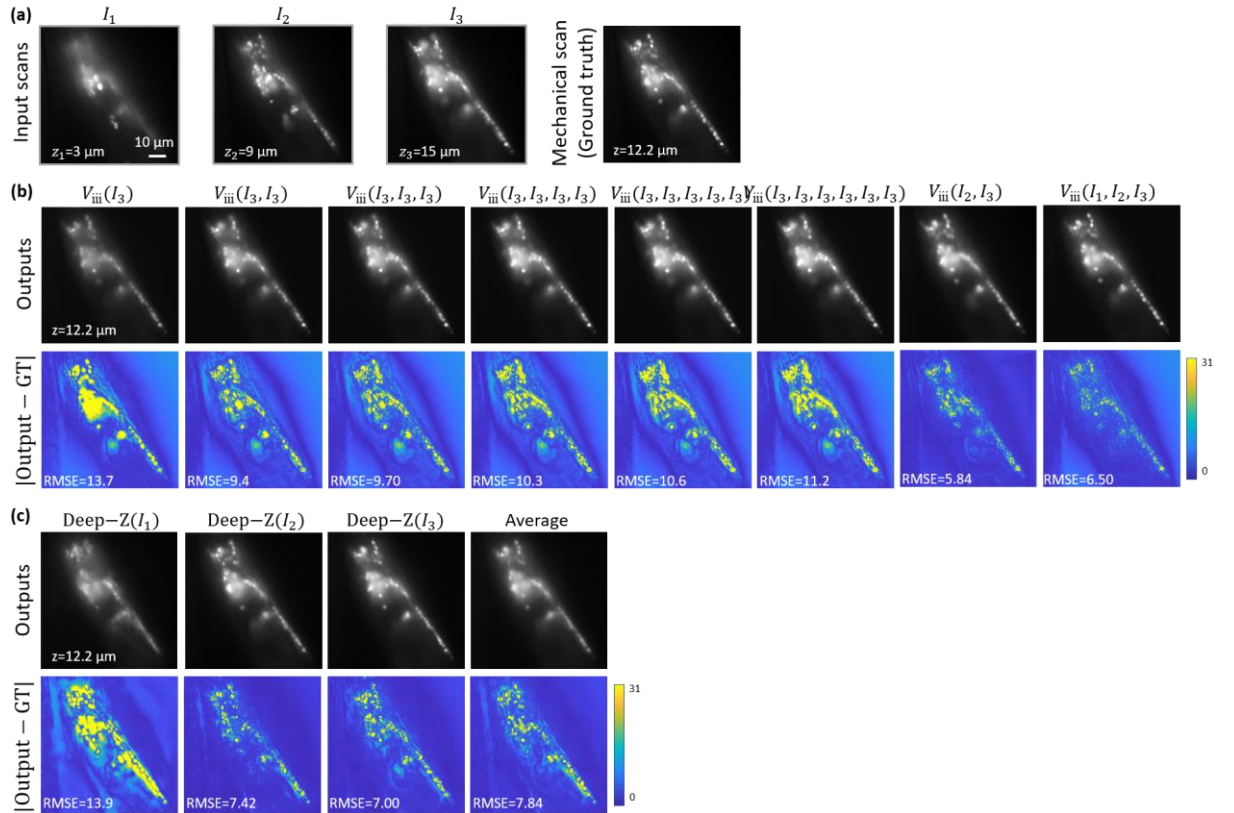

**Fig. S7** Repetition invariance of Recurrent-MZ. Recurrent-MZ ( $M=3$ ) was trained with input sequences with 3 input images ( $I_1$ ,  $I_2$  and  $I_3$ ), but tested by repeatedly feeding the input image ( $I_3$ ). (a) The input images/scans and the corresponding mechanical scan (ground truth) image. (b) Output images of

Recurrent-MZ ( $M=3$ ) with the repetition of the nearest input ( $I_3$ ), 2 nearest inputs ( $I_2, I_3$ ) and all three input images. (c) The outputs of Deep-Z with single input ( $I_1, I_2$  or  $I_3$ ), and the pixel-wise average of three Deep-Z outputs, i.e.,  $\text{Deep-Z}(I_1)$ ,  $\text{Deep-Z}(I_2)$  and  $\text{Deep-Z}(I_3)$ . The range of grayscale images is 255 while that of standard variance images is 31.

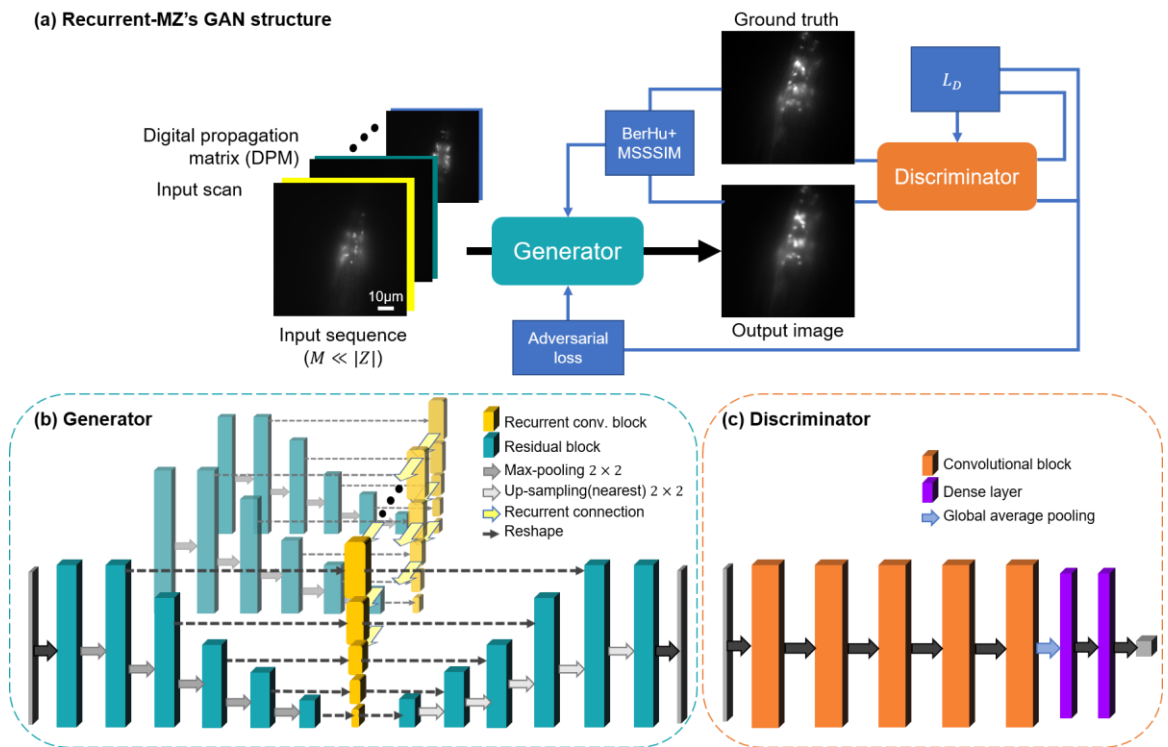

**Fig. S8** Detailed network structure of Recurrent-MZ. (a) The GAN structure and the data flow of Recurrent-MZ. (b) The generator structure of Recurrent-MZ. (c) The discriminator structure used for training Recurrent-MZ.

**Video S1.** Volumetric imaging of *C. elegans* using Recurrent-MZ. Recurrent-MZ takes in the 2 nearest input scans ( $M=2$ ) to each output plane using input images acquired at  $z =$

3,9, and 15  $\mu\text{m}$ . The reconstructed volume ranges from  $z = 0 \mu\text{m}$  to  $z = 18 \mu\text{m}$ . Scale bar: 10  $\mu\text{m}$ .

**Video S2.** Volumetric imaging of fluorescence nanobeads using Recurrent-MZ. Recurrent-MZ takes in 3 input images ( $M=3$ ) of the 50nm fluorescence nanobead-sample imaged at  $z = 3,6,$  and 9  $\mu\text{m}$ . The reconstructed volume ranges from  $z = 0 \mu\text{m}$  to  $z = 10 \mu\text{m}$ . Scale bar: 10  $\mu\text{m}$ .

**Video S3.** Cross-modality volumetric imaging of *C. elegans* using Recurrent-MZ+. Recurrent-MZ+ ( $M=3$ ) propagates 3 wide-field input images into a 3D image stack, matching confocal microscopy images of the same sample. Scale bar: 10  $\mu\text{m}$ .

## References

- 1 Barbastathis G., Ozcan A. & Situ G. On the use of deep learning for computational imaging. *Optica* **6**, 921-943 (2019).
- 2 Kress R. Numerical Analysis. (New York: Springer, 1998).
- 3 Akima H. A New Method of Interpolation and Smooth Curve Fitting Based on Local Procedures. *Journal of the ACM* **17**, 589–602 (1970).
- 4 Akima H. A method of bivariate interpolation and smooth surface fitting based on local procedures. *Communications of the ACM* **17**, 18–20 (1974).
